# Supplementary material
Source: publisher figshare collection journal article supplement (https://karger.figshare.com/ndownloader/files/13637804)
Supplement: Supplementary file 1 [file 13637804]

SUPPLEMENTAL TABLE:

International classification of diseases, Ninth revision codes (ICD-9) for long-term morbidities analyzed

| **Group** | **Subgroup** | **Code** | **Diagnosis Description** |
| --- | --- | --- | --- |
| ***Cardiovascular*** | Hypertension | 4019 | UNSPECIFIED ESSENTIAL HYPERTENSION |
|  | Hypertensive kidney disease | 40390 | UNSP. HYPERTENSIVE KIDNEY DIS. WITH CHRONIC KIDNEY DISEASE STAGE I THROUGH STAGE IV, OR UNSPECIFIED |
|  |  | 40391 | UNSP. HYPERTENSIVE KIDNEY DIS. WITH CHRONIC KIDNEY DISEASE |
|  |  | 40391 | UNSP. HYPERTENSIVE KIDNEY DIS. WITH CHRONIC KIDNEY DISEASE STAGE V OR END STAGE RENAL DISEASE |
|  |  | 40391 | UNSP. HYPERTENSIVE RENAL DIS.+ RENAL FAILURE |
|  |  | 40591 | UNSPECIFIED RENOVASCULAR HYPERTENSION |
|  | Pulmonary heart disease | 4160 | PRIMARY PULMONARY HYPERTENSION |
|  |  | 4168 | OTHER CHRONIC PULMONARY HEART DISEASES |
|  |  | 4169 | CHRONIC PULMONARY HEART DISEASE, UNSPECIFIED |
|  | Cardiomyopathy | 4251 | HYPERTROPHIC OBSTRUCTIVE CARDIOMYOPATHY |
|  |  | 4252 | OBSCURE CARDIOMYOPATHY OF AFRICA |
|  |  | 4253 | ENDOCARDIAL FIBROELASTOSIS |
|  |  | 4254 | OTHER PRIMARY CARDIOMYOPATHIES |
|  |  | 4257 | NUTRITIONAL AND METABOLIC CARDIOMYOPATHY |
|  |  | 4259 | SECONDARY CARDIOMYOPATHY, UNSPECIFIED |
|  |  | 4260 | ATRIOVENTRICULAR BLOCK, COMPLETE |
|  |  | 4263 | OTHER LEFT BUNDLE BRANCH BLOCK |
|  |  | 4264 | RIGHT BUNDLE BRANCH BLOCK |
|  |  | 4267 | ANOMALOUS ATRIOVENTRICULAR EXCITATION |
|  |  | 4270 | PAROXYSMAL SUPRAVENTRICULAR TACHYCARDIA |
|  |  | 4271 | PAROXYSMAL VENTRICULAR TACHYCARDIA |
|  |  | 4272 | PAROXYSMAL TACHYCARDIA, UNSPECIFIED |
|  |  | 4273 | ATRIAL FIBRILLATION AND FLUTTER |
|  |  | 4275 | CARDIAC ARREST |
|  |  | 4279 | CARDIAC DYSRHYTHMIA, UNSPECIFIED |
|  |  | 42611 | FIRST DEGREE ATRIOVENTRICULAR BLOCK |
|  |  | 42612 | MOBITZ (TYPE) II ATRIOVENTRICULAR BLOCK |
|  |  | 42613 | OTHER SECOND DEGREE ATRIOVENTRICULAR BLOCK |
|  |  | 42682 | LONG QT SYNDROME |
|  |  | 42689 | OTHER SPECIFIED CONDUCTION DISORDERS |
|  |  | 42731 | ATRIAL FIBRILLATION |
|  |  | 42732 | ATRIAL FLUTTER |
|  |  | 42741 | VENTRICULAR FIBRILLATION |
|  |  | 42760 | PREMATURE BEATS, UNSPECIFIED |
|  |  | 42761 | SUPRAVENTRICULAR PREMATURE BEATS |
|  |  | 42769 | OTHER PREMATURE BEATS |
|  |  | 42789 | OTHER SPECIFIED CARDIAC DYSRHYTHMIAS |
|  |  | 427811 | SINUS BRADYCARDIA |
|  |  | 4267 1 | WOLFF-PARKINSON-WHITE SYNDROME |
|  | Heart failure | 4280 | CONGESTIVE HEART FAILURE |
|  |  | 4280 | CONGESTIVE HEART FAILURE, UNSPECIFIED |
|  |  | 4281 | LEFT HEART FAILURE |
|  |  | 4289 | HEART FAILURE, UNSPECIFIED |
|  |  | 4290 | MYOCARDITIS, UNSPECIFIED |
|  |  | 4292 | CARDIOVASCULAR DISEASE, UNSPECIFIED |
|  |  | 4293 | CARDIOMEGALY |
|  |  | 42841 | ACUTE COMBINED SYSTOLIC AND DIASTOLIC HEART FAILURE |
| ***Respiratory*** | Pneumonia | 480 | VIRAL PNEUMONIA |
|  |  | 481 | PNEUMOCOCCAL PNEUMONIA |
|  |  | 481 | PNEUMOCOCCAL PNEUMONIA (STREPTOCOCUUS PNEUMONIAE PNEUMONIA) |
|  |  | 483 | PNEUMONIA DUE TO OTHER SPECIFIED ORGANISM |
|  |  | 485 | BRONCHOPNEUMONIA, ORGANISM UNSPECIFIED |
|  |  | 486 | PNEUMONIA, ORGANISM UNSPECIFIED |
|  |  | 4800 | PNEUMONIA DUE TO ADENOVIRUS |
|  |  | 4801 | PNEUMONIA DUE TO RESPIRATORY SYNCYTIAL VIRUS |
|  |  | 4802 | PNEUMONIA DUE TO PARAINFLUENZA VIRUS |
|  |  | 4808 | PNEUMONIA DUE TO OTHER VIRUS NOT ELSEWHERE CLASSIFIED |
|  |  | 4809 | VIRAL PNEUMONIA, UNSPECIFIED |
|  |  | 4820 | PNEUMONIA DUE TO KLEBSIELLA PNEUMONIAE |
|  |  | 4821 | PNEUMONIA DUE TO PSEUDOMONAS |
|  |  | 4822 | PNEUMONIA DUE TO HEMOPHILUS INFLUENZAE (H. INFLUENZAE) |
|  |  | 4823 | PNEUMONIA DUE TO STREPTOCOCCUS |
|  |  | 4829 | BACTERIAL PNEUMONIA, UNSPECIFIED |
|  |  | 4830 | PNEUMONIA DUE TO MYCOPLASMA PNEUMONIAE |
|  |  | 4831 | PNEUMONIA DEU TO CHLAMYDIA |
|  |  | 4838 | PNEUMONIA DUE TO OTHER SPECIFIED ORGANISM |
|  |  | 4841 | PNEUMONIA IN CYTOMEGALIC INCLUSION DISEASE |
|  |  | 4870 | INFLUENZA WITH PNEUMONIA |
|  |  | 48230 | PNEUMONIA DUE TO STREPTOCOCCUS, UNSPECIFIED |
|  |  | 48231 | PNEUMONIA DUE TO STREPTOCOCCUS, GROUP A |
|  |  | 48241 | PNEUMONIA DUE TO STAPHYLOCOCCUS AUREUS |
|  | Bronchitis | 466 | ACUTE BRONCHITIS AND BRONCHIOLITIS |
|  |  | 490 | BRONCHITIS, NOT SPECIFIED AS ACUTE OR CHRONIC |
|  |  | 4660 | ACUTE BRONCHITIS |
|  |  | 4918 | OTHER CHRONIC BRONCHITIS |
|  |  | 49121 | OBSTRUCTIVE CHR. BRONCHITIS WITH(ACUTE)EXACERBATION |
|  | Asthma | 493 | ASTHMA |
|  |  | 4939 | ASTHMA, UNSPECIFIED |
|  |  | 49300 | EXTRINSIC ASTHMA, UNSPECIFIED |
|  |  | 49320 | CHR. OBSTRUCTIVE ASTHMA, UNSPECIFIED |
|  |  | 49321 | CHR. OSBTRUCTIVE ASTHMA WITH STATUS ASTHMATICUS |
|  |  | 49390 | ASTHMA,UNSPECIFIED |
|  |  | 49390 | ASTHMA,UNSPECIFIED TYPE,WITHOUT MENTION OF STATUS ASTHMATICUS |
|  |  | 49390 | ASTHMA,UNSPECIFIED TYPE,WITHOUT MENTION OF STATUS ASTHMATICUS OR ACUTE EXACERBATION OR UNSPECIFIED |
|  |  | 49391 | ASTHMA, UNSPECIFIED TYPE, WITH STATUS ASTHMATICUS |
|  |  | 49392 | UNSPECIFIED ASTHMA WITH (ACUTE) EXACERBATION |
|  |  | 49392 | UNSPECIFIED ASTHMA WITH ACUTE EXACERBATION |
|  | Bronchiolitis | 4661 | ACUTE BRONCHIOLITIS |
|  |  | 46611 | AC. BRONCHIOLITIS DUE TO RESPIRATORY SYNCYTIAL VIRUS (RSV) |
|  |  | 46619 | AC. BRONCHIOLITIS DUE TO OTHER INFECTIOUS ORGANISMS |
|  | Upper respiratory tract infection | 465 | ACUTE UPPER RESPIRATORY INFECTIONS OF MULTIPLE OR UNSP.SITES |
|  |  | 4658 | ACUTE UPPER RESPIRATORY INFECTIONS OF OTHER MULTIPLE SITES |
|  |  | 4659 | ACUTE UPPER RESPIRATORY INFECTIONS OF UNSPECIFIED SITE |
|  | Respiratory influenza | 4871 | INFLUENZA WITH OTHER RESPIRATORY MANIFESTATIONS |
|  |  | 4878 | INFLUENZA WITH OTHER MANIFESTATIONS |
|  |  | 4880 | INFLUENZA DUE TO IDENTIFIED AVIAN INFLUENZA VIRUS |
|  |  | 4881 | INFLUENZA DUE TO IDENTIFIED NOVEL H1N1 INFLUENZA VIRUS |
|  | Bronchiectasis | 494 | BRONCHIECTASIS |
|  |  | 4940 | BRONCHIECTESIS WITHOUT ACUTE EXACERBATION |
|  |  | 4941 | BRONCHIECTASIS WITH ACUTE EXACERBATION |
|  |  | 4959 | UNSPECIFIED ALLERGIC ALVEOLITIS AND PNEUMONITIS |
| ***Heamatologic*** | Anemia | 2848 | OTHER SPECIFIED APLASTIC ANEMIAS |
|  |  | 2849 | APLASTIC ANEMIA, UNSPECIFIED |
|  |  | 2850 | SIDEROBLASTIC ANEMIA |
|  |  | 2851 | ACUTE POSTHEMORRHAGIC ANEMIA |
|  |  | 2852 | ANEMIA IN CHRONIC ILLNESS |
|  |  | 2858 | OTHER SPECIFIED ANEMIAS |
|  |  | 2859 | ANEMIA, UNSPECIFIED |
|  |  | 28481 | RED CELL APLASIA (ACQUIRED)(ADULT)(WITH THYMOMA) |
|  |  | 28489 | OTHER SPECIFIED APLASTIC ANEMIAS |
|  |  | 28521 | ANEMIA IN CHRONIC KIDNEY DISEASE |
|  |  | 28522 | ANEMIA IN NEOPLASTIC DISEASE |
|  |  | 28529 | ANEMIA OF OTHER CHRONIC DISEASE |
|  | Thrombocytopenia | 2873 | PRIMARY THROMBOCYTOPENIA |
|  |  | 2874 | SECONDARY THROMBOCYTOPENIA |
|  |  | 2875 | THROMBOCYTOPENIA, UNSPECIFIED |
|  |  | 28730 | PRIMARY THROMBOCYTOPENIA, UNSPECIFIED |
|  |  | 28731 | IMMUNE THROMBOCYTOPENIC PURPURA |
|  |  | 28732 | EVANS' SYNDROME |
| ***Endocrine*** | Hypothyroidism | 243 | CONGENITAL HYPOTHYROIDISM |
|  |  | 2449 | UNSPECIFIED ACQUIRED HYPOTHYROIDISM |
|  | Diabetes mellitus | 25001 | JUVENILE TYPE DIABETES MELLITUS WITHOUT MENTION OF COMPLICATION |
|  |  | 25001 | TYPE I(JUVENILE TYPE), DIABETES MELLITUS WITHOUT COMPLICATION,NOT STATED AS UNCONTROLLED |
|  |  | 25003 | DIABETES MELLITUS WITHOUT COMPLICATION, TYPE I, UNCONTROLLED |
|  |  | 25011 | JUVENILE TYPE DIABETES MELLITUS WITH KETOACIDOSIS |
|  |  | 25011 | TYPE I (JUVENILE TYPE), DIABETES MELLITUS WITH KETOACIDOSIS, NOT STATED AS UNCONTROLLED |
|  |  | 25013 | DIABETES WITH KETOACIDOSIS, TYPE I, UNCONTROLLED |
|  |  | 25031 | JUVENILE DIABETES, NOT STATED AS UNCONTROLLED, WITH OTHER COMA |
|  |  | 25041 | TYPE I (JUVENILE TYPE) DIABETES WITH RENAL MANIFESTATIONS NOT STATED AS UNCONTROLLED |
|  |  | 25081 | JUVENILE DIABETES, NOT STATED AS UNCONTROLLED,+SPEC. MANIFESTATIN |
|  |  | 25081 | TYPE I(JUVENILE TYPE),DIABETES WITH SPECIFIED MANIFESTATION NOT STATED AS UNCONTROLLED |
|  |  | 25083 | JUVENILE DIABETES, UNCONTROLLED, + SPEC. MANIFESTATIONS |
|  |  | 2500 | DIABETES MELLITUS WITHOUT MENTION OF COMPLICATION |
|  |  | 2508 | DIABETES WITH OTHER SPECIFIED MANIFESTATIONS |
|  |  | 24900 | SECONDARY DIABETES MELLITUS WITHOUT MENTION OF COMPLICATION, NOT STATED AS UNCONTROLLED, OR UNSPECIFIED |
|  |  | 24901 | SECONDARY DIABETES MELLITUS WITHOUT MENT. OF COMPLI. UNCONTROLLED |
|  |  | 25000 | TYPE II/UNSPECIFIED TYPE, DIABETES MELLITUS WITHOUT COMPLICATION, NOT STATED AS UNCONTROLLED |
|  |  | 25002 | TYPE II OR UNSPECIFIED TYPE, DIABETES MELLITUS, UNCONTROLLED |
|  |  | 25010 | TYPE II OR UNSPECIFIED TYPE, DIABETES MELLITUS WITH KETOACIDOSIS, NOT STATED AS UNCONTROLLED |
|  |  | 25050 | ADULT-ONSET DIABETES,NOT STATED AS UNCONTROLLED,+OPHTALMIC MANIFE |
|  |  | 25050 | TYPE II OR UNSPECIFIED TYPE,DIABETES WITH OPHTALMIC MANIFESTATION NOT STATED AS UNCONTROLLED |
|  |  | 25080 | TYPE II OR UNSPECIFIED TYPE,DIABETES WITH SPECIFIED MANIFESTATION NOT STATED AS UNCONTROLLED |
|  | Hyperlipidemia | 2721 | PURE HYPERGLYCERIDEMIA |
|  |  | 2722 | MIXED HYPERLIPIDEMIA |
|  |  | 2724 | OTHER AND UNSPECIFIED HYPERLIPIDEMIA |
|  | Overweight and obesity | 2779 | UNSPECIFIED DISORDER OF METABOLISM |
|  |  | 2780 | OVERWEIGHT AND OBESITY |
|  |  | 2781 | LOCALIZED ADIPOSITY |
|  |  | 27800 | OBESITY, UNSPECIFIED |
|  |  | 27801 | MORBID OBESITY |
|  |  | 27802 | OVERWEIGHT |
| ***Neurologic*** | Autism/PDD | 2990 | AUTISTIC DISORDER |
|  |  | 2990 | INFANTILE AUTISM |
|  |  | 2998 | OTHER SPECIFIED PERVASIVE DEVELOPMENTAL DISORDERS |
|  |  | 29900 | AUTISTIC DISORDER, CURRENT OR ACTIVE STATE |
|  |  | 29901 | AUTISTIC DISORDER, RESIDUAL STATE |
|  |  | 29910 | CHILDHOOD DISINTEGRATIVE DISORDER, CURRENT OR ACTIVE STATE |
|  |  | 29981 | OTHER SPECIFIED PERVASIVE DEVELOPMENTAL DISORDERS, RESIDULA STATE |
|  |  | 29990 | UNSPECIF.PERVASIVE DEVELOPMENTAL DISORDER,CURRENT OR ACTIVE STATE |
|  | Disorders of eating | 3071 | ANOREXIA NERVOSA |
|  |  | 3075 | OTHER AND UNSPECIFIED DISORDERS OF EATING |
|  |  | 30750 | EATING DISORDER, UNSPECIFIED |
|  |  | 30751 | BULIMIA NERVOSA |
|  |  | 30752 | PICA |
|  |  | 30753 | RUMINATION DISORDER |
|  |  | 30759 | OTHER DISORDERS OF EATING |
|  | OSA | 32723 | OBSTRUCTIVE SLEEP APNEA (ADULT)(PEDIATRIC) |
|  | Epilepsy and infantile spasms | 3450 | GENERALIZED NONCONVULSIVE EPILEPSY |
|  |  | 3452 | PETIT MAL STATUS, EPILEPTIC |
|  |  | 3453 | GRAND MAL STATUS, EPILEPTIC |
|  |  | 3455 | PARTIAL EPILEPSY, WITHOUT IMPAIRMENT OF CONSCIOUSNESS |
|  |  | 3456 | INFANTILE SPASMS |
|  |  | 3459 | EPILEPSY, UNSPECIFIED |
|  |  | 34500 | GENERALIZED NONCONVULSIVE EPILEPSY WITHOUT INTRACTABLE EPILEPSY |
|  |  | 34501 | GENERALIZED NONCONVULSIVE EPILEPSY WITH INTRACTABLE EPILEPSY |
|  |  | 34510 | GENERALIZED CONVULSIVE EPILEPSY WITHOUT INTRACTABLE EPILEPSY |
|  |  | 34511 | GENERALIZED CONVULSIVE EPILEPSY WITH INTRACTABLE EPILEPSY |
|  |  | 34540 | PARTIAL EPILEPSY+IMPAIRMENT OF CONSCIOUSNESS WITHOUT INTRACTABLE EPILEPSY |
|  |  | 34550 | PARTIAL EPILEPSY WITHOUT IMPAIRMENT OF CONSCIOUSNESS WITHOUT INTR ACTABEL EPILEPSY |
|  |  | 34560 | INFANTILE SPASMS WITHOUT INTRACTABLE EPILEPSY |
|  |  | 34590 | EPILEPSY, NUSP. WITHOUT INTRACTABEL EPILEPSY |
|  |  | 34590 | EPILEPSY, UNSP. WITHOUT INTRACTABLE EPILEPSY |
|  |  | 34591 | EPILEPSY UNSP. WITH INTRACTABLE EPILEPSY |
|  | CP | 3439 | INFANTILE CEREBRAL PALSY, UNSPECIFIED |
| ***Urinary*** | Pyelonephritis | 5901 | ACUTE PYELONEPHRITIS |
|  |  | 59000 | CHRON.PYELONEPHRITIS WITHOUT LESION OF RENAL MEDULL.NECROSIS |
|  |  | 59010 | AC.PYELONEPHRITIS WITHOUT LESION OF RENAL MEDULLARY NECROSIS |
|  |  | 59080 | PYELONEPHRITIS, UNSPECIFIED |
|  | Urinary tract infection | 5990 | URINARY TRACT INFECTION, SITE NOT SPECIFIED |
